# Supplementary material for: Genome-Wide Identification of AP2/ERF Superfamily Genes in Juglans mandshurica and Expression Analysis under Cold Stress
Source: MDPI journal article supplement (doi:10.3390/ijms232315225), 2022-12-03
Supplement: s1 [file s1]

## Supplementary Figures

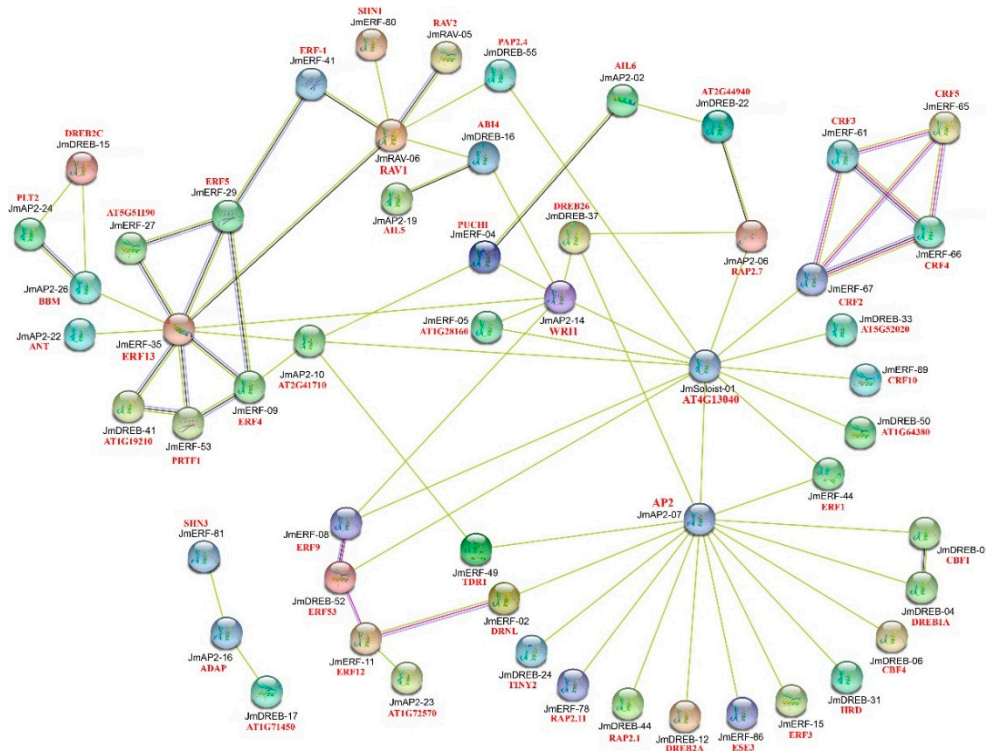

**Figure S1.** Protein-Protein interaction network of all *JmAP2/ERF* genes in *J. mandshurica*. Stronger associations are represented by thicker lines.

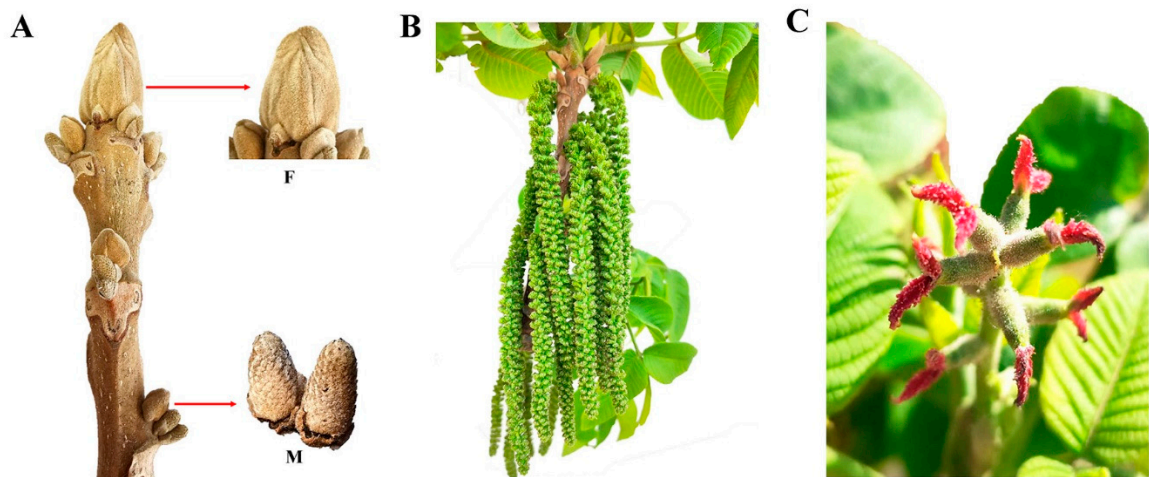

**Figure S2.** All experimental materials of *J. mandshurica* used in this study. The experimental materials are different tissues of *J. mandshurica*. (A), Current-year branches in winter. F is female flower buds. M is male flower buds. (B) Male flowers during the flowering period. (C), Female flowers during the flowering period.
